# Supplementary material
Source: PubMed Central journal article supplement (PMC4860105)
Supplement: NIHMS761041-supplement-Supplementary_Text_and_Figures.pdf [file NIHMS761041-supplement-Supplementary_Text_and_Figures.pdf]

## Benakis *et al.* Supplementary Figure 1

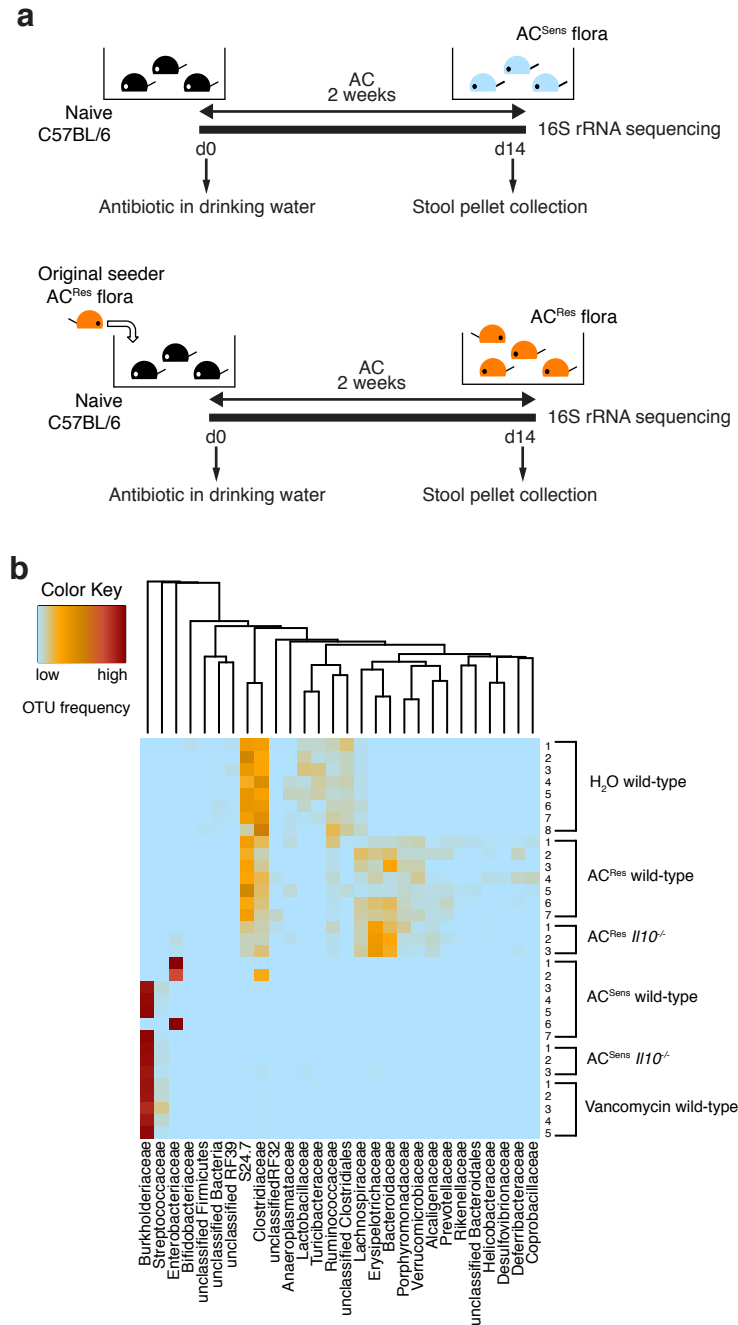

### Supplementary Figure 1 *In vivo* model of intestinal dysbiosis and antibiotic-resistant flora.

(a) Upper panel, experimental layout of intestinal dysbiosis. Experimental naive 7-week-old C57BL/6 mice are treated for 2 weeks with amoxicillin and clavulanic acid (AC). Mice with a modification of the intestinal microbiota are named AC-sensitive flora mice (AC<sup>Sens</sup>). Lower panel, colonization of AC resistant flora (AC<sup>Res</sup>) from the original seeder mouse to naive 7-week-old C57BL/6 mice. Naive mice (black) are co-housed with a seeder mouse (orange) carrying antibiotic resistant microbiota and received antibiotics in the drinking water for 2 weeks. Because of the coprophagic behavior of mice, the resistant flora is successfully transmitted to naive mice. Stool pellets are collected 14 days after co-housing for 16S ribosomal RNA (rRNA) analysis. (b) The heat map depicts family-level operational taxonomic unit (OTU) frequencies of bacterial populations observed in non-treated animals (H<sub>2</sub>O), AC<sup>Res</sup>, AC<sup>Sens</sup> wild-type and 1110<sup>-/-</sup> KO mice, and vancomycin-treated wild-type mice after 2 weeks of treatment. Only OTUs with frequency > 1% were included.

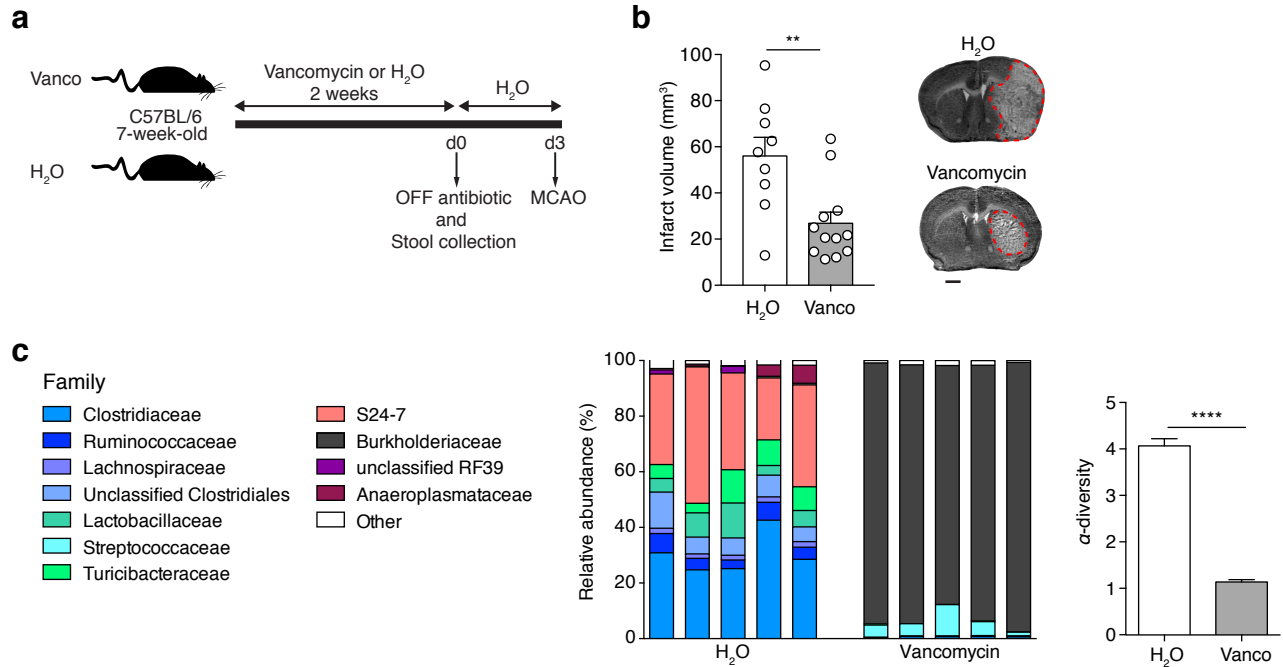

**Supplementary Figure 2** Vancomycin alters gut flora and induces protection from ischemic brain injury. **(a)** Experimental layout of vancomycin treatment in 7-week-old C57BL/6 mice. Mice receive water alone (H<sub>2</sub>O) or vancomycin (Vanco) in drinking water (0.5 g/L) for 2 weeks. Stool pellets are collected 14 days after treatment for r16S sequencing. Administration of antibiotic is discontinued 3 days prior to MCAO. **(b)** Infarct volume of H<sub>2</sub>O ( $n = 9$ ) and vancomycin ( $n = 12$ ) mice as measured by Nissl staining of brain sections on day 3 post MCAO (bar, 1 mm). **(c)** Left panel indicates color code for the most predominant bacterial families found in the mouse intestine. Mid panel shows phylogenetic classification of 16S rDNA frequencies in stool samples collected from H<sub>2</sub>O and vancomycin mice treated for 2 weeks. Each bar represents one mouse. Right panel depicts intestinal microbiota  $\alpha$ -diversity (H<sub>2</sub>O,  $n = 8$ ; vancomycin,  $n = 5$ ). Throughout, error bars represent mean  $\pm$  s.e.m. \*\* $P < 0.01$ , \*\*\*\* $P < 0.0001$ ; by Student's  $t$ -test.

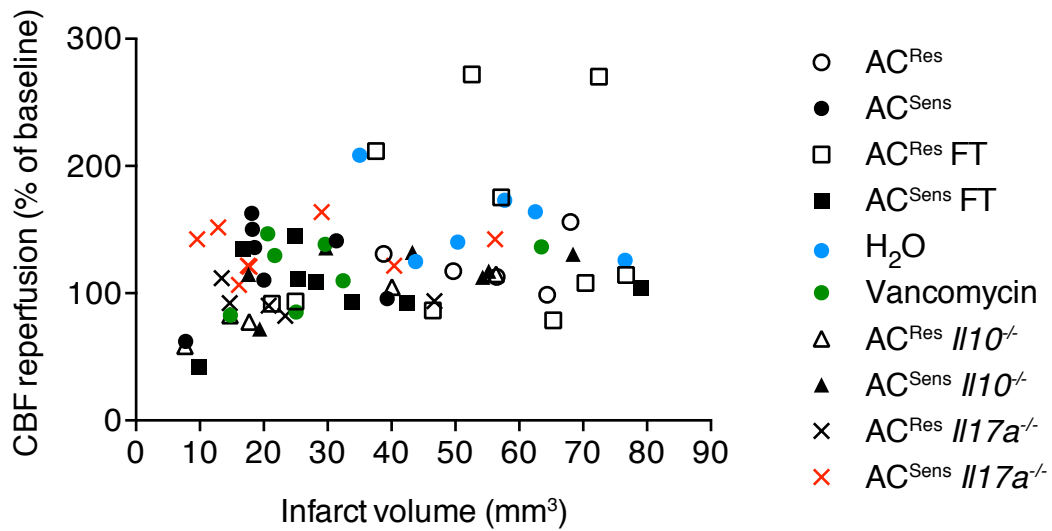

**Supplementary Figure 3** Correlation plot between cerebral blood flow (CBF) reperfusion (mean values are from 10 to 20 minutes after reperfusion) and infarct volume 72 h after MCAO in all groups tested; each data point represent one animal.

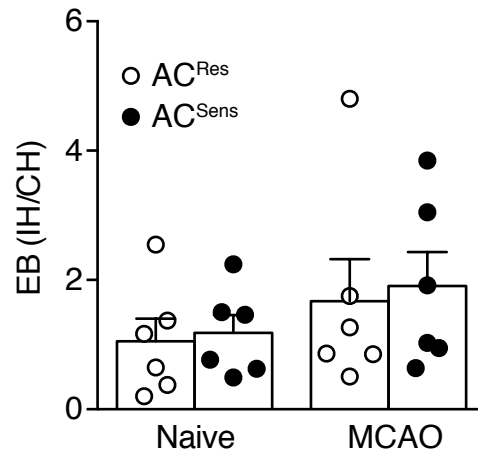

**Supplementary Figure 4** Measurement of blood brain barrier permeability by Evans Blue (EB) extravasation is not different in naive AC<sup>Res</sup> and AC<sup>Sens</sup> mice and 6 h after MCAO. Data are expressed as ratio of the ipsilateral hemisphere (IH) and contralateral hemisphere (CH), ( $n = 6$  per group). Columns represent mean  $\pm$  s.e.m. (Student's  $t$ -test).

## Benakis *et al.* Supplementary Figure 5

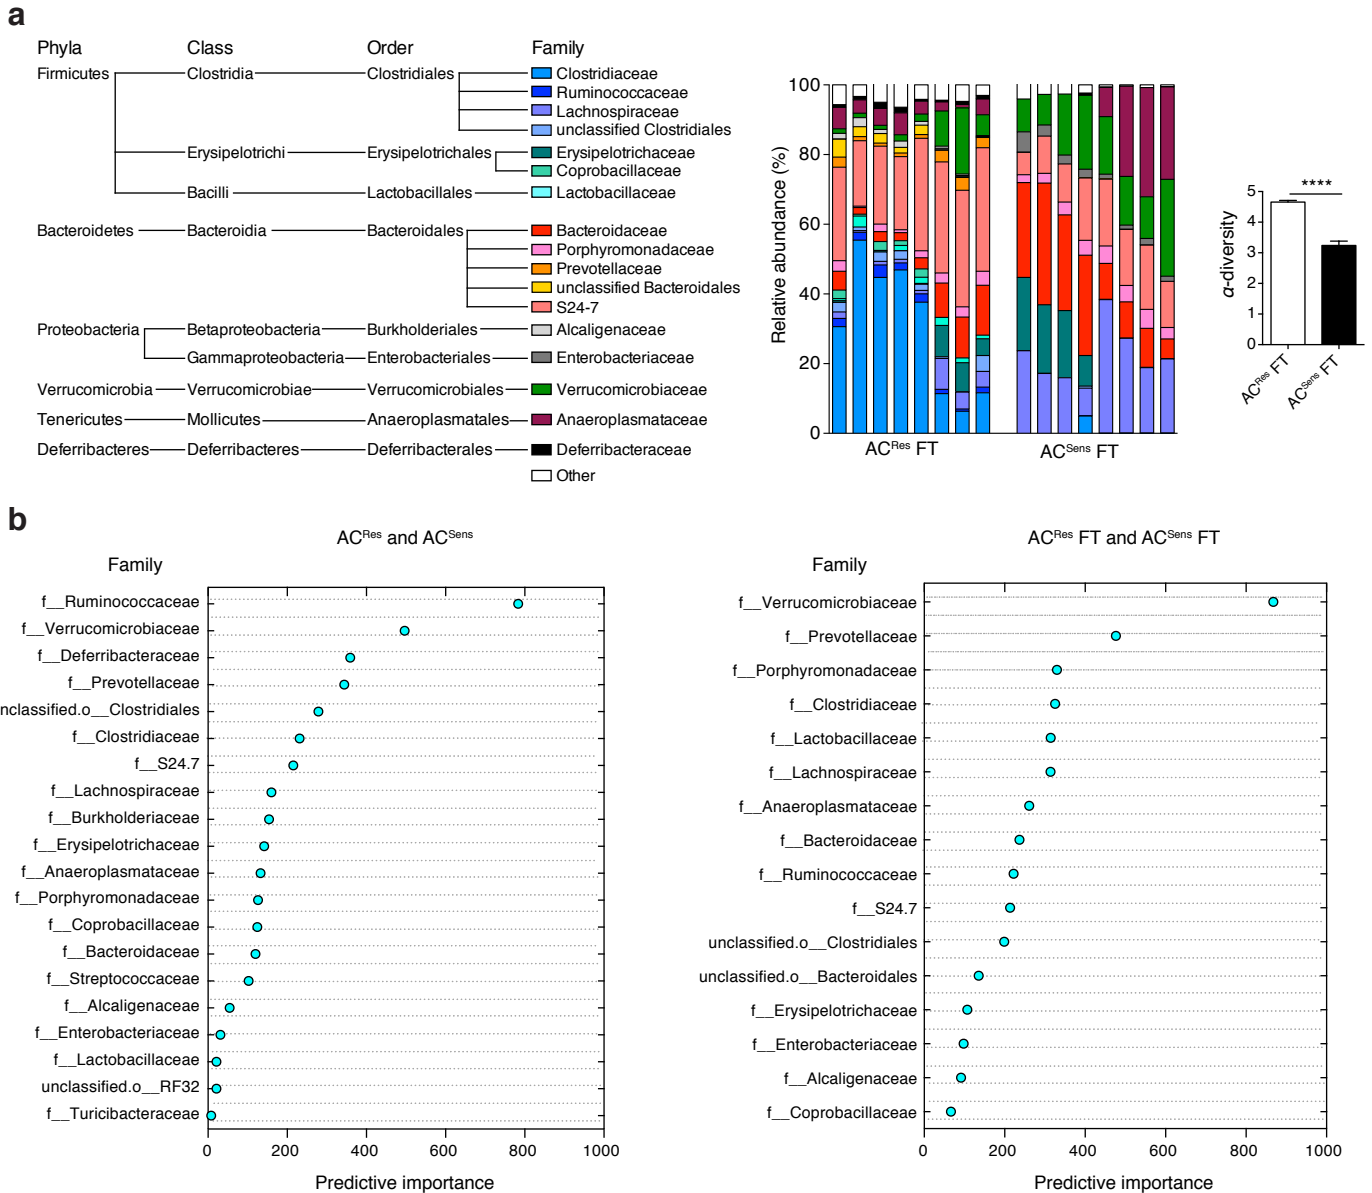

**Supplementary Figure 5** Phylogenetic analysis of fecal transplanted (FT) mice. **(a)** Left panel indicates color code for the most predominant bacterial families. Mid panel shows family-level phylogenetic classification of 16S rDNA frequencies in stool samples collected from AC<sup>Res</sup> and AC<sup>Sens</sup> mice 2 weeks after fecal transplantation. Each bar represents an individual animal. For clarity only families represented over 1% were included. Right, graph depicts intestinal microbiota  $\alpha$ -diversity ( $n = 8$  per group). Columns represent mean  $\pm$  s.e.m. \*\*\*\* $P < 0.0001$  (Student's  $t$ -test). **(b)** Random forest analysis showing predictive importance of operational taxonomic units (OTU) at the family level (OTUs  $> 1\%$  were included) trained for stroke outcome in AC<sup>Res</sup> and AC<sup>Sens</sup> (left panel) and AC<sup>Res</sup> FT and AC<sup>Sens</sup> FT mice (right panel).

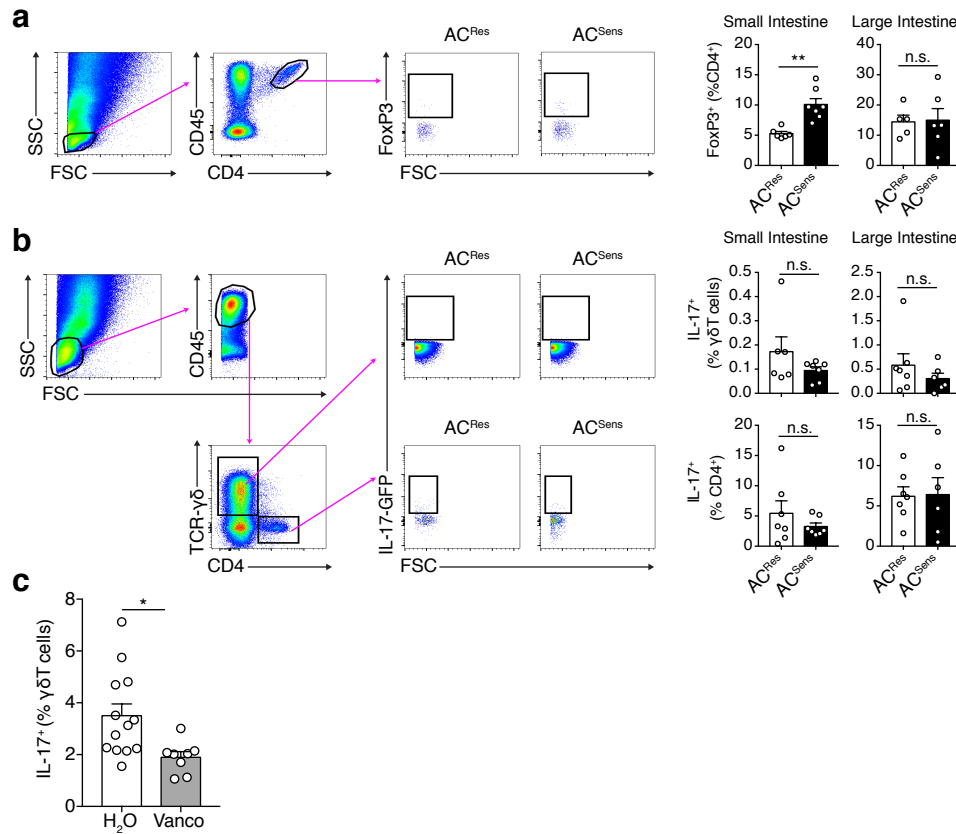

**Supplementary Figure 6** T<sub>reg</sub>, but not IL-17<sup>+</sup> γδ T cells are affected in intraepithelial lymphocytes (IELs) of AC<sup>Sens</sup> mice. **(a)** T<sub>reg</sub> population (CD45<sup>+</sup>CD4<sup>+</sup>FoxP3<sup>+</sup>) in the IELs of the small intestine of AC<sup>Res</sup> and AC<sup>Sens</sup> analyzed by flow cytometry. Graphs represent percentage of FoxP3<sup>+</sup> in the epithelium of the small (AC<sup>Res</sup>, *n* = 6 and AC<sup>Sens</sup>, *n* = 7) and large intestine (AC<sup>Res</sup>, *n* = 5 and AC<sup>Sens</sup>, *n* = 6). **(b)** Flow cytometry analyzing IL-17 production in γδ T cells (CD45<sup>+</sup>TCR-γδ<sup>+</sup>CD4<sup>-</sup>) and T<sub>H</sub>17 (CD45<sup>+</sup>TCR-γδ<sup>-</sup>CD4<sup>+</sup>) in the IELs of the small intestine from AC<sup>Res</sup> and AC<sup>Sens</sup> mice after two weeks on antibiotic. The boxes in the dot plots gate IL-17<sup>+</sup> cells in γδ T cells (first row) and IL-17<sup>+</sup> in T<sub>H</sub>17 cells (second row) in AC<sup>Res</sup> and AC<sup>Sens</sup> mice. The bar graphs indicate percentage of IL-17 producing cells in the small (AC<sup>Res</sup>, *n* = 6–7 and AC<sup>Sens</sup>, *n* = 7) and large intestine (AC<sup>Res</sup>, *n* = 7 and AC<sup>Sens</sup>, *n* = 6). Columns represent mean ± s.e.m.; no significant changes (n.s.) are observed between groups (Student's *t*-test). **(c)** Similarly to AC treatment, IL-17<sup>+</sup> γδ T cells are suppressed in the lamina propria (LP) of the small intestine in vancomycin-treated mice. Graphs show percentage of IL-17 production in γδ T cells (CD45<sup>+</sup>TCR-γδ<sup>+</sup>CD4<sup>-</sup>) in the LP of the small intestine from H<sub>2</sub>O (*n* = 13) and vancomycin (*n* = 8) mice after 2 weeks. Columns represent mean ± s.e.m. \**P* < 0.05 and \*\**P* < 0.01 (Student's *t*-test).

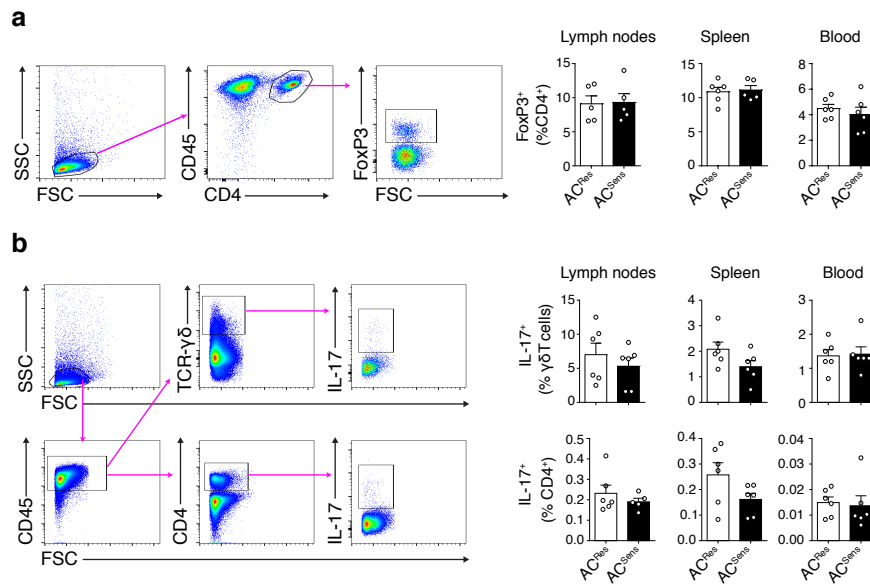

**Supplementary Figure 7** IL-17<sup>+</sup> γδ T cells, IL-17<sup>+</sup> CD4 cells (T<sub>H</sub>17) and T<sub>reg</sub> cell analysis in lymph nodes, spleen and blood of AC<sup>Res</sup> and AC<sup>Sens</sup> mice. **(a)** Flow cytometry gating strategy of T<sub>reg</sub> cells (CD45<sup>+</sup>CD4<sup>+</sup>FoxP3<sup>+</sup>) in the lymph nodes. Graphs indicate number of FoxP3<sup>+</sup> cells as a percentage of CD4<sup>+</sup> cells in AC<sup>Res</sup> and AC<sup>Sens</sup> mice in the lymph nodes ( $n = 5$  per group), spleen (AC<sup>Res</sup>,  $n = 6$  and AC<sup>Sens</sup>,  $n = 5$ ) and blood ( $n = 6$  per group). **(b)** Flow cytometry gating strategy to identify IL-17<sup>+</sup> γδ T cells (CD45<sup>+</sup>TCR-γδ<sup>+</sup>IL-17<sup>+</sup>) and T<sub>H</sub>17 cells (CD45<sup>+</sup>CD4<sup>+</sup>IL-17<sup>+</sup>) in the lymph nodes. IL-17 production is analyzed by intracellular staining of IL-17. Graphs indicate number of IL-17<sup>+</sup> cells as a percentage of γδ T cells (first row) and IL-17<sup>+</sup> cells as a percentage of CD4 cells (second row) in AC<sup>Res</sup> and AC<sup>Sens</sup> mice in the lymph nodes, spleen and blood ( $n = 6$  per group). Throughout, error bars represent mean ± s.e.m.; no significant changes are observed between groups (Student's *t*-test).

## Benakis *et al.* Supplementary Figure 8

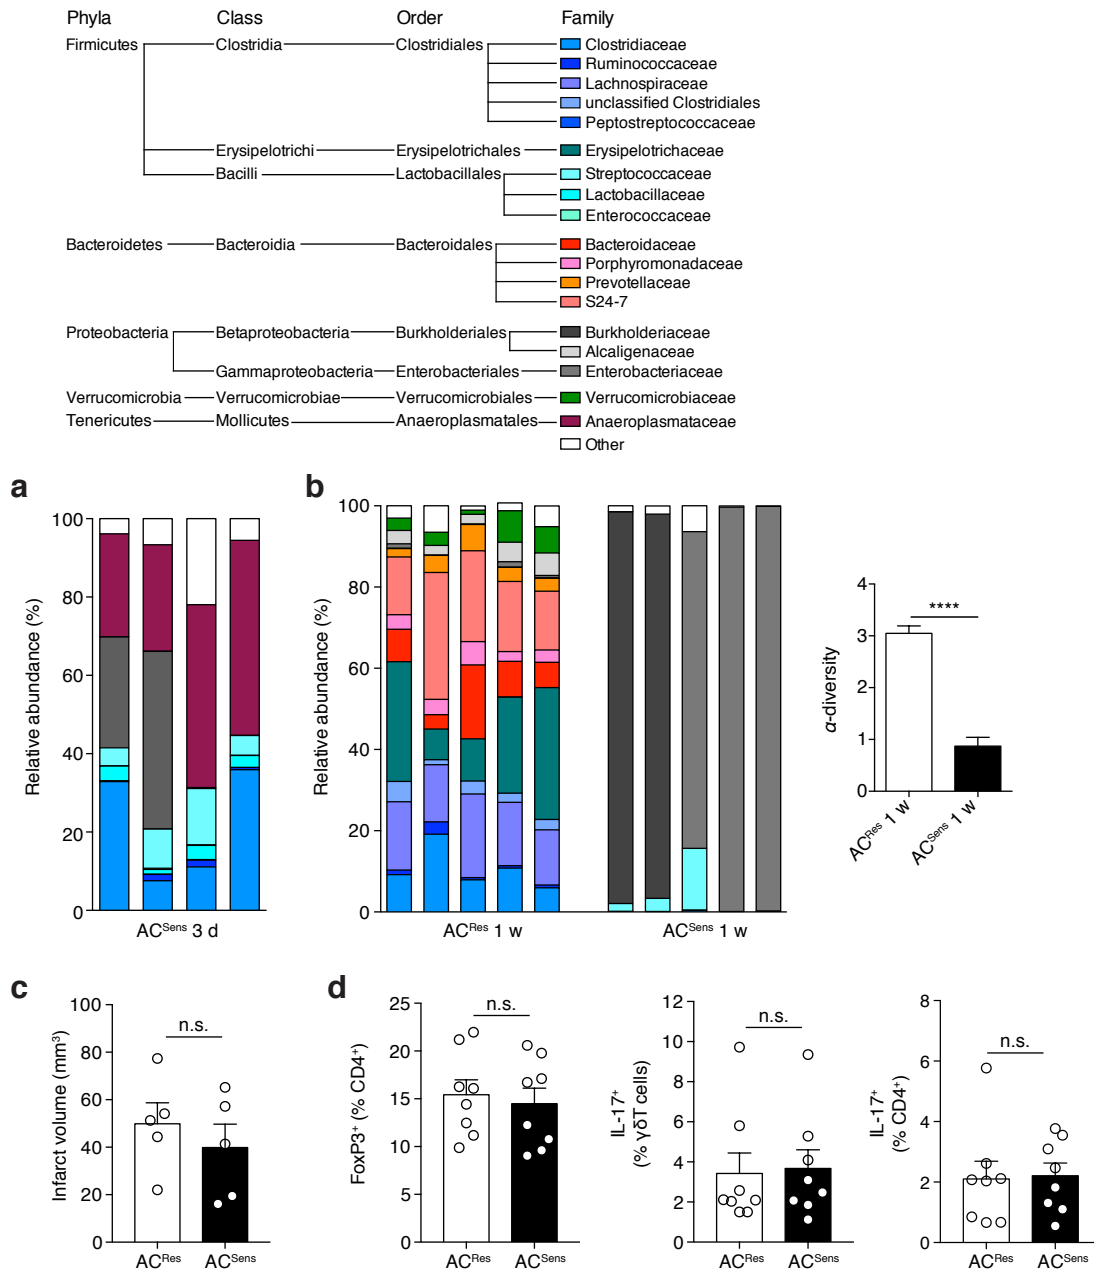

**Supplementary Figure 8** One week of AC treatment does not induce protection from ischemic brain injury and changes in intestinal immune cell response. Top panel indicates color code for the most predominant bacterial families. Lower panel shows family-level phylogenetic classification of 16S rDNA frequencies in stool samples collected (a) from AC<sup>Sens</sup> mice treated for 3 days or (b) from AC<sup>Res</sup> and AC<sup>Sens</sup> after 1 week of antibiotic. Each bar represents an individual animal. Only families represented over 1% were included. Right, graph depicts intestinal microbiota  $\alpha$ -diversity ( $n = 4-5$ ). (c) Infarct volume of AC<sup>Res</sup> ( $n = 5$ ) and AC<sup>Sens</sup> ( $n = 5$ ) mice treated for 1 week as measured by Nissl staining of coronal brain sections on day 3 post MCAO (bar, 1 mm). (d) Flow cytometry analyzing T<sub>reg</sub> (CD45<sup>+</sup>CD4<sup>+</sup>FoxP3<sup>+</sup>), IL-17 production in  $\gamma\delta$  T cells (CD45<sup>+</sup>TCR- $\gamma\delta$ <sup>+</sup>CD4<sup>-</sup>) and T<sub>H</sub>17 cells (CD45<sup>+</sup>TCR- $\gamma\delta$ <sup>-</sup>CD4<sup>+</sup>) in the LP of the small intestine from AC<sup>Res</sup> and AC<sup>Sens</sup> mice after 1 week on antibiotic ( $n = 8$  per group). Data are expressed as mean  $\pm$  s.e.m. \*\*\*\* $P < 0.0001$ ; n.s., not significant; by Student's  $t$ -test.



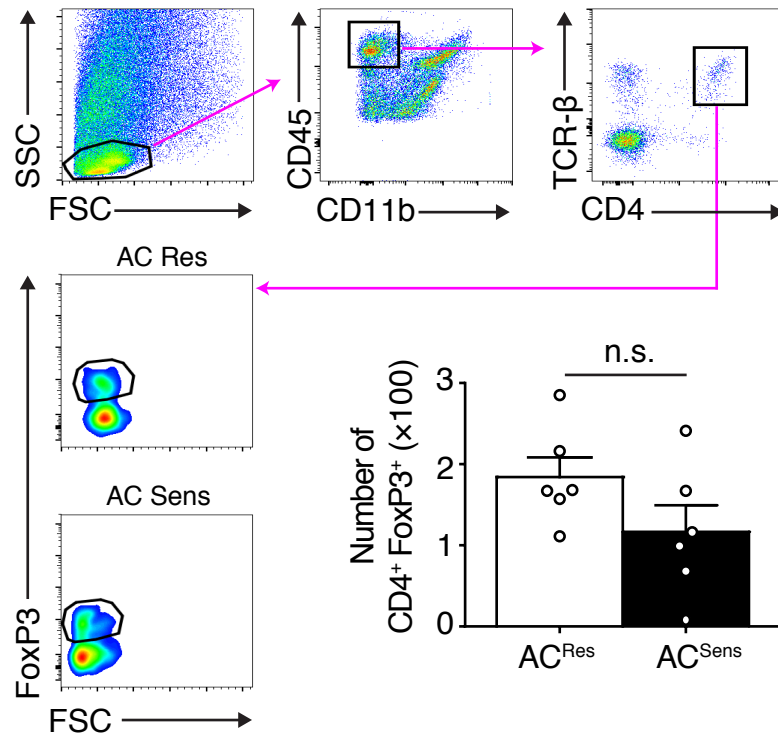

**Supplementary Figure 9** Intestinal dysbiosis does not alter meningeal T<sub>reg</sub> after brain ischemia. Flow cytometry analyzing regulatory T cells (CD45<sup>high</sup>CD4<sup>+</sup>TCR-β<sup>+</sup>FoxP3<sup>+</sup>) in the meninges of AC<sup>Res</sup> and AC<sup>Sens</sup> mice 16 h after ischemia. The graph represents the total number of meningeal T<sub>reg</sub> 16 h after MCAO in AC<sup>Res</sup> ( $n = 6$ ) and AC<sup>Sens</sup> ( $n = 6$ ) mice. One data point represent one animal. Columns represent mean  $\pm$  s.e.m.; n.s., not significant (Student's  $t$ -test).

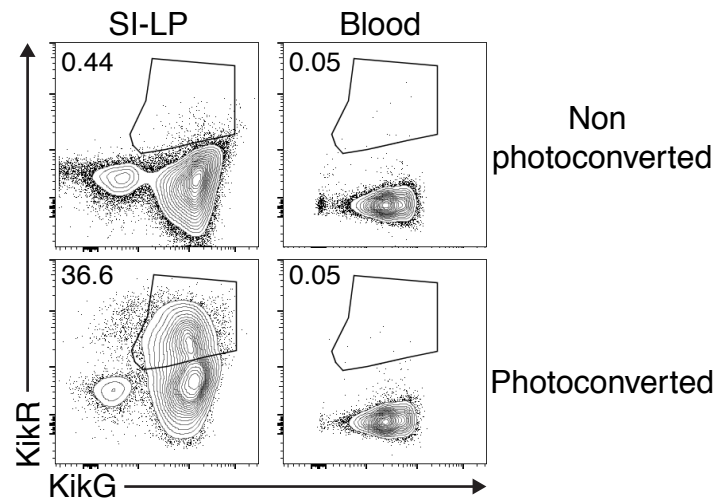

**Supplementary Figure 10** Photoconversion in the small intestine does not label circulating immune cells. Distal small intestine (6 cm) from KikGR mice are exposed for 20 min to violet light (405 nm) (photoconverted) or to ambient room light (non-photoconverted). Immediately after photoconversion, blood and small intestine (SI-LP) are extracted and analyzed by flow cytometry for KikR<sup>+</sup> cells. The gates in the dot plots identify KikR<sup>+</sup> cells, and the numbers are the percentage of KikR<sup>+</sup> cells of total lymphocytes (CD45<sup>high</sup>CD11b<sup>-</sup>); gating strategy is as indicated in Figure 4b.

|                                                | CBF MCA<br>occlusion (%) | CBF<br>reperfusion (%)   | week old   | weight (g)   | body<br>temperature<br>(°C) | N  | protection<br>(+/-) |
|------------------------------------------------|--------------------------|--------------------------|------------|--------------|-----------------------------|----|---------------------|
| AC <sup>Res</sup>                              | 8.1 ± 0.7                | 126.5 ± 9.2              | 9.4 ± 0.07 | 25.3 ± 0.3   | 36.6 ± 0.1                  | 16 | -                   |
| AC <sup>Sens</sup>                             | 10.2 ± 1.1               | 132.5 ± 8.2              | 9.4 ± 0.06 | 24.3 ± 0.4   | 35.7 ± 0.4                  | 18 | +                   |
| AC <sup>Res</sup> FT                           | 9.6 ± 0.9                | 150.2 ± 24.2             | 9.3 ± 0.09 | 22.7 ± 0.6** | 35.6 ± 0.2                  | 10 | -                   |
| AC <sup>Sens</sup> FT                          | 9.1 ± 1.0                | 102.6 ± 9.9              | 9.2 ± 0.10 | 23.3 ± 0.5   | 35.8 ± 0.2                  | 9  | +                   |
| H <sub>2</sub> O                               | 11.4 ± 0.9               | 165.2 ± 14.4             | 9.3 ± 0.02 | 23.6 ± 0.7   | 35.8 ± 0.2                  | 7  | -                   |
| Vancomycin                                     | 8.1 ± 0.7                | 118.5 ± 9.9              | 9.4 ± 0.01 | 24.8 ± 0.5   | 35.8 ± 0.2                  | 7  | +                   |
| AC <sup>Res</sup> <i>Il10</i> <sup>-/-</sup>   | 6.9 ± 0.4                | 87.6 ± 10.1 <sup>∞</sup> | 9.2 ± 0.06 | 23.9 ± 0.6   | 36.2 ± 0.3                  | 5  | -                   |
| AC <sup>Sens</sup> <i>Il10</i> <sup>-/-</sup>  | 7.6 ± 0.8                | 116.5 ± 8.2              | 9.3 ± 0.06 | 24.3 ± 0.4   | 36.1 ± 0.3                  | 7  | -                   |
| AC <sup>Res</sup> <i>Il17a</i> <sup>-/-</sup>  | 9.1 ± 0.9                | 94.0 ± 4.9               | 9.6 ± 0.2  | 22.5 ± 1.0*  | 35.7 ± 0.1                  | 5  | +                   |
| AC <sup>Sens</sup> <i>Il17a</i> <sup>-/-</sup> | 10.0 ± 1.3               | 133.9 ± 6.8              | 9.3 ± 0.1  | 24.0 ± 0.7   | 36.1 ± 0.3                  | 8  | +                   |

**Supplementary Table 1** Percentages of cerebral blood flow (CBF) reduction after middle cerebral artery (MCA) occlusion and CBF mean values from 10 to 20 min after reperfusion. Mouse age (weeks), weight (g) and body temperature (°C) at the time of MCAO induction. Data are represented as mean ± s.e.m. <sup>∞</sup> indicate significant difference in CBF reperfusion between H<sub>2</sub>O and AC<sup>Res</sup> *Il10*<sup>-/-</sup> mice, <sup>∞</sup>p<0.05 (one-way ANOVA), and \* indicate significant difference in body weight between AC<sup>Res</sup>, and AC<sup>Res</sup> FT and AC<sup>Res</sup> *Il17a*<sup>-/-</sup>, \*P < 0.05 and \*\*P < 0.01 (one-way ANOVA).

|                                                | N  | exclusion<br>(death) | exclusion<br>(CBF) | survival<br>72 h post MCAO(%) |
|------------------------------------------------|----|----------------------|--------------------|-------------------------------|
| AC <sup>Res</sup> (Fig.1d)                     | 9  | 1                    | 0                  | 88                            |
| AC <sup>Sens</sup> (Fig.1d)                    | 11 | 2                    | 0                  | 82                            |
| AC <sup>Res</sup> (Fig.1e)                     | 12 | 1                    | 0                  | 92                            |
| AC <sup>Sens</sup> (Fig.1e)                    | 14 | 3                    | 0                  | 79                            |
| AC <sup>Res</sup> FT                           | 10 | 0                    | 2                  | 100                           |
| AC <sup>Sens</sup> FT                          | 9  | 0                    | 1                  | 100                           |
| H <sub>2</sub> O                               | 10 | 0                    | 1                  | 100                           |
| Vancomycin                                     | 13 | 1                    | 0                  | 92                            |
| AC <sup>Res</sup> <i>Il10</i> <sup>-/-</sup>   | 9  | 2                    | 1                  | 78                            |
| AC <sup>Sens</sup> <i>Il10</i> <sup>-/-</sup>  | 10 | 1                    | 0                  | 90                            |
| AC <sup>Res</sup> <i>Il17a</i> <sup>-/-</sup>  | 6  | 0                    | 0                  | 100                           |
| AC <sup>Sens</sup> <i>Il17a</i> <sup>-/-</sup> | 11 | 3                    | 0                  | 73                            |

**Supplementary Table 2** Number of mice excluded upon death and non-satisfactory cerebral blood flow (CBF) during occlusion or 10 min after reperfusion. The percentage of survival at 72 h after MCAO is not different between groups and treatment (Fisher's exact test).

**a**

|       | AC <sup>Res</sup> microglia |       |   | AC <sup>Sens</sup> microglia |       |   | P value | AC <sup>Res</sup> CD45 |       |       | AC <sup>Sens</sup> CD45 |       |      | P value |        |
|-------|-----------------------------|-------|---|------------------------------|-------|---|---------|------------------------|-------|-------|-------------------------|-------|------|---------|--------|
|       | mean                        | s.e.m | n | mean                         | s.e.m | n |         | mean                   | s.e.m | n     | mean                    | s.e.m | n    |         |        |
| naive | 23950                       | 3520  | 9 | 23099                        | 3531  | 8 | 0.9     | naive                  | 1744  | 316   | 9                       | 1298  | 101  | 8       | 1.0    |
| d1    | 36908                       | 2951  | 6 | 27742                        | 3405  | 8 | 0.1     | d1                     | 4172  | 1612  | 6                       | 1708  | 233  | 7       | 0.8    |
| d2    | 24299                       | 3128  | 7 | 31153                        | 4933  | 9 | 0.2     | d2                     | 53167 | 11179 | 7                       | 17464 | 5775 | 9       | 0.0004 |
| d3    | 21409                       | 3598  | 9 | 19373                        | 1745  | 9 | 0.7     | d3                     | 41100 | 12315 | 9                       | 7203  | 1242 | 7       | 0.0007 |

  

|       | AC <sup>Res</sup> mono/mph |       |   | AC <sup>Sens</sup> mono/mph |       |   | P value | AC <sup>Res</sup> PMN |       |      | AC <sup>Sens</sup> PMN |       |     | P value |       |
|-------|----------------------------|-------|---|-----------------------------|-------|---|---------|-----------------------|-------|------|------------------------|-------|-----|---------|-------|
|       | mean                       | s.e.m | n | mean                        | s.e.m | n |         | mean                  | s.e.m | n    | mean                   | s.e.m | n   |         |       |
| naive | 595                        | 112   | 9 | 486                         | 52    | 8 | 1.0     | naive                 | 358   | 82   | 9                      | 249   | 32  | 8       | 1.0   |
| d1    | 2560                       | 1226  | 6 | 796                         | 161   | 7 | 0.8     | d1                    | 566   | 155  | 5                      | 394   | 84  | 7       | 0.9   |
| d2    | 26420                      | 8266  | 7 | 11382                       | 3126  | 9 | 0.0     | d2                    | 18823 | 4765 | 7                      | 1313  | 279 | 8       | 2E-09 |
| d3    | 28605                      | 8535  | 9 | 5145                        | 1022  | 8 | 0.0004  | d3                    | 4173  | 1463 | 9                      | 601   | 105 | 7       | 0.1   |

  

|       | AC <sup>Res</sup> CD4 |       |   | AC <sup>Sens</sup> CD4 |       |   | P value | AC <sup>Res</sup> CD8 |       |    | AC <sup>Sens</sup> CD8 |       |    | P value |       |
|-------|-----------------------|-------|---|------------------------|-------|---|---------|-----------------------|-------|----|------------------------|-------|----|---------|-------|
|       | mean                  | s.e.m | n | mean                   | s.e.m | n |         | mean                  | s.e.m | n  | mean                   | s.e.m | n  |         |       |
| naive | 70                    | 13    | 9 | 74                     | 12    | 8 | 1.0     | naive                 | 51    | 12 | 9                      | 43    | 5  | 8       | 0.8   |
| d1    | 107                   | 47    | 6 | 71                     | 17    | 8 | 0.7     | d1                    | 56    | 14 | 5                      | 64    | 15 | 8       | 0.8   |
| d2    | 373                   | 86    | 7 | 142                    | 36    | 9 | 0.004   | d2                    | 117   | 22 | 7                      | 69    | 16 | 8       | 0.2   |
| d3    | 481                   | 104   | 9 | 109                    | 19    | 9 | 3E-06   | d3                    | 268   | 55 | 9                      | 76    | 19 | 9       | 1E-06 |

  

|       | AC <sup>Res</sup> B cells |       |   | AC <sup>Sens</sup> B cells |       |   | P value | AC <sup>Res</sup> NK |       |    | AC <sup>Sens</sup> NK |       |   | P value |       |
|-------|---------------------------|-------|---|----------------------------|-------|---|---------|----------------------|-------|----|-----------------------|-------|---|---------|-------|
|       | mean                      | s.e.m | n | mean                       | s.e.m | n |         | mean                 | s.e.m | n  | mean                  | s.e.m | n |         |       |
| naive | 121                       | 38    | 9 | 74                         | 20    | 8 | 0.3     | naive                | 1     | 1  | 9                     | 0     | 0 | 6       | 0.9   |
| d1    | 55                        | 23    | 6 | 47                         | 11    | 8 | 0.9     | d1                   | 11    | 5  | 6                     | 13    | 5 | 8       | 0.9   |
| d2    | 165                       | 31    | 7 | 86                         | 21    | 9 | 0.1     | d2                   | 37    | 10 | 7                     | 11    | 4 | 8       | 0.3   |
| d3    | 214                       | 65    | 9 | 87                         | 19    | 8 | 0.011   | d3                   | 82    | 37 | 9                     | 25    | 8 | 8       | 0.012 |

**b**

|       | %reduction AC <sup>Sens</sup> PMN of AC <sup>Res</sup> | %reduction AC <sup>Sens</sup> mono/mph of AC <sup>Res</sup> | %reduction AC <sup>Sens</sup> CD8 of AC <sup>Res</sup> | %reduction AC <sup>Sens</sup> B cells of AC <sup>Res</sup> | %reduction AC <sup>Sens</sup> NK of AC <sup>Res</sup> |
|-------|--------------------------------------------------------|-------------------------------------------------------------|--------------------------------------------------------|------------------------------------------------------------|-------------------------------------------------------|
| n     | 8                                                      | 9                                                           | 8                                                      | 9                                                          | 8                                                     |
| mean  | -93.02                                                 | -56.92                                                      | -40.95                                                 | -47.74                                                     | -69.58                                                |
| s.e.m | 1.484                                                  | 11.83                                                       | 13.47                                                  | 12.67                                                      | 10.12                                                 |

**Supplementary Table 3** Supportive table to Fig.3a. **(a)** Exact *n* values, absolute number of cells in the ischemic hemisphere (mean ± s.e.m.) and *P* values in AC<sup>Res</sup> and AC<sup>Sens</sup> naive mice and days 1, 2 and 3 after MCAO for each immune cell markers analyzed by flow cytometry. Outliers were identified using the ROUT method with a maximum false discovery rate of *Q* = 2%. **(b)** Exact *n* values and percentages of immune cell reduction 2 days after MCAO (mean ± s.e.m.) in AC<sup>Sens</sup> mice compared to AC<sup>Res</sup> mice.

| Ratio<br>$T_{reg}/\gamma\delta T$ | $T_{reg}$ from WT $CD4^+$ cells induced with DC-AC <sup>Sens</sup> |        |    | $T_{reg}$ from WT $CD4^+$ cells induced with DC-AC <sup>Res</sup> |        |    | $T_{reg}$ from <i>Il10</i> <sup>-/-</sup> $CD4^+$ cells induced with DC-AC <sup>Sens</sup> |        |   |
|-----------------------------------|--------------------------------------------------------------------|--------|----|-------------------------------------------------------------------|--------|----|--------------------------------------------------------------------------------------------|--------|---|
|                                   | mean                                                               | s.e.m. | n  | mean                                                              | s.e.m. | n  | mean                                                                                       | s.e.m. | n |
| 0:1                               | 100                                                                |        | 11 | 100                                                               |        | 14 | 100                                                                                        |        | 9 |
| 1:8                               | 75.26                                                              | 6.230  | 11 | 98.82                                                             | 5.084  | 12 | 107.7                                                                                      | 9.673  | 9 |
| 1:4                               | 63.31                                                              | 6.060  | 11 | 91.99                                                             | 5.995  | 14 | 78.80                                                                                      | 5.224  | 9 |
| 1:2                               | 54.54                                                              | 5.404  | 11 | 64.82                                                             | 5.018  | 13 | 70.34                                                                                      | 8.069  | 9 |
| 1:1                               | 38.24                                                              | 4.703  | 11 | 54.82                                                             | 4.533  | 13 | 56.12                                                                                      | 4.703  | 9 |

**Supplementary Table 4** Supportive tables to Fig.6d showing exact *n* values, percentage of IL-17<sup>+</sup>  $\gamma\delta$  T cells (mean  $\pm$  s.e.m.) per group and ratio for each data point analyzed by flow cytometry.
